# Supplementary material
Source: publisher site journal article supplement (https://www.dovepress.com/article/332545)
Supplement: Supplementary file 1 [file get_supplementary_file.php]

**Supplementary Files**

**Supplementary file 1: IN-DEPTH AND KEY-INFORMANT INTERVIEW GUIDES**

1. **IN-DEPTH INTERVIEW GUIDE**

**Informed consent for in-depth interviews with perinatal partner violence victims: English version**

**Title: To explore the postpartum women’s lived experience of perinatal intimate partner violence in rural and urban settings, Wolaita Zone, South Ethiopia: A qualitative study**

**Introduction**

Good day. My name is ________________. I am representing School of Public Health, Addis Ababa University. We are conducting in-depth interview with an individuals who are selected conveniently based on their exposure to perinatal IPV and we believe that you have rich source of information concerning this issues.

**Purpose of this research**

The purpose of this study is to understand the lived experiences of postpartum women about perinatal IPV. You are among those selected to participate in this study. The findings of the study will be used to highlight about women life events among postpartum women and to design interventions for its preventions in the future.

**Procedures**

You are one of the women selected purposively for this in-depth interview. We are asking for your permission to interview you about your lived experience with regard to life events. The interview will take about 30 minutes. We will talk with a range of issues related to violence that happens to every women like you. So, I request your volunteer participation.

**Risk and discomfort**

The expected maximum risk of this interview may be a less psychological disturbance. If the interview has any disturbance emotionally, further interview will be stopped and counseling and follow-up care will be given. The interview may take some of your time. However, we try to make it short and to the point and guide you through the interview.

**Benefits**

There will be no direct benefit to you from participating in this study, but the genuine information that you would provide is paramount important for us. We are asking for your help to ensure that information we collect is accurate. Based on the information you provide us, we will design strategies for prevention of this phenomenon.

**Confidentiality**

Information from this interview is confidential. We will not record the names of any participant. Your name will not appear on the interview questionnaire, digital recording or any other study document. You will only be identified by a code that has no link to your name or other identifying information. Any information gathered during this interview will not be shared for third bodies and further security; it will be locked in a file cabinet.

**Right to refuse or withdraw**

This interview is completely voluntary and you can choose not to participate and even if you agree to participate, you may withdraw at any time. There will not be any penalty if you decide not to participate or withdraw from the interview.

If you have any questions or concerns related to this, we will give you principal investigator phone numbers Mr. Tafesse Lamaro:+251912922271 or Dr. Negussie Deyessa: phone number: +251911400059

In addition, I will give you IRB contact address of Addis Ababa University, College of Health Science**:** Tel: +251115538734

***Do you have any questions about the interview? Do we have your agreement to proceed?***

Yes, I agree to be in the study **[___]** No, I do not wish to participate in this study **[__]**

**________________________ ______________________ _____________**

Consent obtainer’s Name Consent obtainer’s signature Date

**Consent form**

I, the undersigned, confirm that I give consent to participate in this study. It is with a clear understanding of the objectives and conditions of the study with recognition of my right to withdraw from the study if I change my mind. I have been given the necessary information about the research. I have also been assured that I can withdraw my consent at any time without penalty or loss of benefits. The main purpose of study has been explained to me in the language I understand.

Participant’s signature/finger print_____________________date_________/_______/________

Name of Interviewer: _____________________________________

Interviewer’s Signature:_________________date______/________/_________

1. **Socio-demographic characteristics of study participants**

| *Part. Code* | *Age* | *Education* | *Residence* | *Occupation* | *Religion* | *Age of*  *index child* | *No.of*  *children* | *Birth control status* |
| --- | --- | --- | --- | --- | --- | --- | --- | --- |
|  |  |  |  |  |  |  |  |  |

**2. Directions:** In the following interview stage, I am going to ask you which are common to many women. When two people marry or live together, they usually share both good and bad moments. I would now like to ask you some questions about your recent relationships and how your husband / partner treated you. If anyone interrupts us I will change the topic of conversation. I would again like to assure you that your answers will be kept secret, and that you do not have to answer any questions that you do not want to. May I continue?

| ***No*** | ***Main questions*** | ***Probing questions*** |
| --- | --- | --- |
|  | *Could you please tell me a little about yourself?* | - *Where do you live now?* - *How many children do you have? Male________, Female________* - *How do you normally spend your days?* - *What things do you like to do?* |
|  | *Could you please tell me a little about your husband?* | - *How did you first meet?* - *When did you get married?* - *What does he do?* - *How you explain your partner’s feeling (Sad vs Happy) about index birth?* - *What was a sex preference of your partner about index birth? Why?* |
|  | *What is your main reason to visit this institution?* | - *When did your current problems with your husband start?* - *How long has this continued?* - *Did this happen for you before? When?* |
|  | *When did your problems with your husband start?* | - *Explain how your husband treats you before you get pregnant for this child?* - *How he treated you during pregnancy? Would you explain more?* - *How he treated you after childbirth?* - *Did he ever make you to continue or terminate pregnancy against your will? When and How?* |
|  | *How does he treat you in front of others in the perinatal period?* | - *Did your partner use respectful words while talking to you?* - *How your partner treats in front of your relatives, and friends?* - *How your partner treats in front of strangers and at your home? Would you explain more?* - *How it affected your psychological well-being? In what ways?* - *How has it affected your feelings about yourself?* |
|  | *Could you tell me if your partner has ever inflicted any physical harm on your body in the perinatal period?* | - *Was he ever hit or hurt you before or during pregnancy following childbirth? When? Where? Why?* - *Was he used an object or weapon, e.g. a shoe, a knife, a gun, a telephone, a fist?* - *Has anything been broken or damaged (i.e. phone ripped out of the wall)?* - *Has anything been thrown directly at you or near you?* |
|  | *Could you tell me if your partner harassed you sexually in the perinatal period? Before or after birth of index child?* | - *How did you see the sexual relationship with your partner?* - *How do you resolve sex disagreements? When and how often to have sex with disagreement?* - *Have you ever gone to bed because you were afraid of him?* - *Has your partner ever forced you to have a sex by using a weapon, or by physically hurting you?* - *Have you ever had sex with your partner because they have threatened, pressured, forced, or hurt you? What happened?* |
|  | *How can you explain your husband’s feelings about contraceptive use before versus now?”* | - *How you discuss with your husband about contraceptive methods before pregnancy and after delivery of this child?* - *Did your husband protect you from using contraception? When and how?* - *Have you ever stopped or continued using contraception due to abuse from husband?* - *Did your husband ever restricted (hided, withhold, removed) contraceptives for this pregnancy and birth this child?* |

**That is the end of our interview:**

**Thank you so much for sharing your thoughts with me!**

1. **KEY-INFORMANT INTERVIEW GUIDE (HEWs)**

**Written consent for in-depth interviews with Health Extension Workers: English version**

**Title: The postpartum women’s lived experiences of perinatal IPV in Wolaita zone, South Ethiopia: A qualitative study**

Good day. My name is ____________. I am representing the School of Public Health, Addis Ababa University. I am a PhD student at this institution. We are conducting a study to generate empirical evidence on perinatal IPV against postpartum women. The objective of the study is to explore the postpartum women’s lived experiences of perinatal partner violence for index child and to indicate important prevention strategy on this problem. You are among those selected to participate in this study.

We are asking for your permission to interview you about your experience with regard to postpartum women’s violence sharing habits. The interview will take about 30 minutes. We will talk with you about a range of issues related to partner violence.

This interview is completely voluntary – you can choose not to participate, and even if you agree to participate, you may withdraw at any time. There will not be any penalty if you decide not to participate or withdraw from the interview. Your decision to participate will not affect your employment at this institution or any other institution in Ethiopia.

Information from this interview is confidential. We will not record the names of any study participant. Your name will not appear on the interview questionnaire, digital recording, or any other study document. You will only be identified by a code that has no link to your name or other identifying information. Information collected during individual interviews will not be shared directly with other people and will be grouped together with information from other interviews in all reports and presentations.

There will be no direct benefit to you from participating in this study but we expect the findings will be good input in the way preventing violence against women in Ethiopia. We are asking for your help to ensure that the information we collect is accurate. I can provide you with the phone number for the research team, Dr. Nigussie Deyessa **(Tel: +251 911 400 059)** if you have any questions or concerns in relation to this assessment.

Do you have any questions about the interview? Do we have your agreement to proceed?

Yes, I agree to be in the studyNo, I do not wish to participate in this study

Proceed the interview Stop the interview here

______________________________ _____________________________ __________

Print name of Person Obtaining Consent Signature of Person Obtaining Consent Date

Thank you again for agreeing to participate in this interview today. As we discussed, the aim of this study is to explore the postpartum women’s lived experiences of intimate partner violence and provide possible recommendations on the prevention strategy of violence against postpartum women in Ethiopia. The ideas and information you will provide are very important to the study and will help us improve performance. However, if there are any questions that make you uncomfortable and you would prefer not to answer, or you would like to stop the interview, please let me know.

Do you have any questions before we begin?

| The rest of the questions in this interview will be more like a conversation. I am interested in your thoughts on the topics I’ll be asking you. There is no right or wrong answer. I will not write everything you will have to say, but I may take notes some times to make sure we accurately record what you are saying. Our conversations will be audio recorded only to ensure the main massages are captured. If you don’t want to answer any part question, you can jump or stop. If you don’t want to be audio recorded, I can stop it.  Can we continue? ______________  If yes, ask the questions  **First I’d like to know about your job in this institution.** | | |
| --- | --- | --- |
|  | ***Main questions*** | ***Probes*** |
| ***1.*** | *What are your main job responsibilities in this institution?*  *Do you have other job responsibilities in relation to second staff at your organization?* | - *When did you start this job?* - *What are your academic qualifications?* - *How many years’ experience does have in this area and trainings?* |
| ***2.*** | *What are major grievances that make women to visit this institution?* | - *Can you comment which segment of women mostly visit your institutions?* - *How these women regularly visit this institution?* - *Would you explain more?* - *How about postpartum women?* |
| ***3.*** | *Did postpartum women with index child aged below twelve months visit your institutions for sake of help/advice seeking?* | - *What is their main reason to visit this institution?* - *Is there partner abuse related issues* - *How you solve these problems?* - *Would you explain more?* - *Any story sharing related to this?* |
| ***4*** | *How do you explain postpartum women habit of reporting partner violence at your locality, community or at your working sites?* | - *Women’s shares their partner abuse for you?* - *Could you tell when and how often times they shares to your institutions?* - *Would you explain more?* |
| ***5.*** | *Could you tell me forms of husbands’ abuse women shares for you: Whether it is psychological, physical or sexual violence?* | - *Did they share different forms of violence separately?* - *How? When it will occurs more*   *(Pre-pregnancy, pregnancy or following child birth)?*   - *Any story sharing?* |

**That is end of our interview**

**Thank you so much for sharing your thoughts with me.**

**Supplementary file 2**

**Themes and sub-themes emerged from open-ended responses: postpartum women’s lived experiences of perinatal intimate partner violence in Wolaita zone, South Ethiopia**

|  | **Themes** | **Some of excerpts** |
| --- | --- | --- |
| Postpartum women’s experiences of perinatal IPV | Perinatal psychological IPV | *“He keeps saying this, 'We will meet after your safe birth'…” (P-2)*  *“…but he scares me. ‘I will show you my hidden identity that you have never known. I will discipline you; hmm … I will give your result’. He raised his hand to hit [showing his action of intent to hit]. I keep so silent and never give an answer, I never argue with him loudly. If I am such a woman; he could have killed me.”* (P-3)  *“He called me ‘a bar lady’. How can I tell you all his insolent? He insults me in all manners. ‘I saw you here and there…’ I am very afraid to mention what he said.” (P-5)*  *“…I said, ’they made crops to be eaten. Your brothers made me suffer. I was insulted; they harassed me because I told them [brothers-in-law] to keep their cows enclosed’.”**(P-6)*  *“…He threw ridiculous words at me! Like that. Even the words were humiliating. If I respond back, we will get into conflict. If we are in that mood, I leave home and come back until he calm. Almost, He was just saying the most disgusting words to me.”* (P-8)  *“…Go away! I will slap you away. You ‘Mulchiyaa’ [Dirty tear]! ”* (P-19)  *“…Women also shares about their experience that husbands belittles them in front of their children. Some say that he never gives me any place in front of other”* (HEW-3) |
| Perinatal physical IPV | *“…When I was four months pregnant, I was cleaning my house and she [neighbor] neglected me. After that, he came from outside and he slapped my ear. So, one ear stopped hearing after he slapped me.”* (P-1).  *“…He approached from the back and kicked me when cooking dinner. Immediately, I fell towards the fire and got injured. After I fell to the ground, we went to a traditional birth attendant’s house and she told us I was pregnant.” (P-2)*  “Since *our wedding, he has hit me with whatever he found … even by ‘Kincora’ [big knife] until people called him crazy. I reported him once and had him jailed here in the Keble [lowest administrative unit in Ethiopia] because of using a Kincora*.” (P-4)  *“…He just kicked me, but I did not react to him since I was in postpartum. However, he often injured me when I was pregnant.”* (P-8)  *“A sharp knife in his hand broke and slides down into ground. Then; my mother died, I have adorned her earrings with gold, He slapped my ear and broke it. I sold the broken gold for ninety birr and bought children’s dinner. If I accuse him and bring to Keble; it is me to feed him if he is jailed.”* (P-10)  *“…Yes he was throwing at me. He breaks coffee cups if he is an angry. He threw at me; but it reaches at other place. It grounds down.”* (P-11)  *“… He kicked my abdomen and went out. At the time, I was three months pregnant.” (P-15)*  *“…After he slapped me, this ear severely pained me, and then I failed forward into chairs that injured me badly.”* (P-18)  “…*He started a conflict with me and grasped the baby and threw her from high distance... then baby became unconscious for a long time.”* (P-1)  *“…They come here with many burns and injury. Then, immediately we take picture for evidence and commence legal process for justice”* ( HEW-3)  *“…In this community, many women have been stabbed by their husbands and they never help to get medical treatment after stabbing… this week, a woman came for treatment after being stabbed by her husband, three weeks after child-birth for trivial reasons.” (HEW-4)* |
| Perinatal sexual IPV | *“… One night he asked and forced me to have sexual intercourse without my willingness. Due to lack of power; I submitted my body to his sexual demands.”(P-1)*  *“…He forced me [to have sex] within fourteen days of having a child.”* (P-1)  *“… I submitted to his sexual demands because I was frightened that he would beat me. What can I do? You can’t equate women’s and men’s power.”(P-4)*  *“…I cried and shed tears until people gathered. Family shouted at him,’…shame on you! Why did you do that to her. She is powerless’. Then, I gave birth at night towards morning hours.” (P-5)*  *“ …We are fights each other regarding this issue[sexual intercourse]”* (P-15)  *“…If I refuse it [sex], he beats me. He pushed me to lie down on bed when I was pregnant. It [forceful sex] is exacerbated after childbirth” (P-19)*  *“…Many husbands use excessive forces including kicks and slaps to sleep [to have sex] with their wives” (HEW-4)* |
| Perinatal economic IPV | *“…When I asked him money; he responded to me saying, ‘I paid for my father burial credit. So I have no money’…”*(P-1)  *“…Now we have problem with house stuffs. He gives only one thousand; what it means in this inflated life. He gives me the same as his salary was two thousand; now his salary increased to six thousand. He never adds zero cents.”*(P-3)  *“…I sold that sheep. Still now; even single hen not allowed looking. At a time I have donkey, oxen and others but now, he protected me to have cows; donkeys. ‘You will call white; black when you have it; in my house even rats will not be raise,’ he said. He closed all my ways to earn money. I was a businessman before. It now grabbed my energy and made it easier for me to sit. I have no body to judge it. This is how I live…”*(P-10)  *“…He never gives any money and suffers us a lot. He says nothing about what we drink and what we eat. He cares nothing for home stuffs” (P-12)*  *“…He is not taking care of his children. He say nothing for what is full and what is empty”* (P-15)  *“…Not giving money properly for household necessities …transferring all property to other relatives and making her empty”* (HEW-1) |
| Perinatal controlling behaviors | *‘’…He didn’t let me go to the market and didn’t allow me go out. I wouldn’t speak if one of my family members came to our house. We just couldn’t speak… he was waiting.” (P-5)*  *“…The other thing is that I did not visit my family. I lost my family to him. I just left my family for him. I felt discomfort since I was either from him, nor my family.”*(P-8)  *“…then he stayed out of the house by mistake and suddenly came home to see if I was home or not. Everyone in the yard got married. No one comes to my house. I was just waiting for him as the door opened.”* (P-9)  *“Now, God rebuked him. Once up on time; he came drank, ‘’ you stayed in family home a day!’’ He did not like my father since my father not need my hardship. He said that you spend all day in your father’s house. ‘After I returned from the church, I drank coffee. Then I went to attend the funeral in far distance. Right now; I am making supper for the children, where did I go?’ I said.”*(P-10)  *“…Then he stayed out of the house by falsely and suddenly came home to see if I was home or not.’’* (P-9)  *“…He is suspects me that I am with some guy”* (P-12)  *“…Commonly what hear from victims is their partner restricts them in involving social affairs.” (HEW-5)* |
| Deprivations of basic needs | *“…I said,’you hear me, now you have a good working condition, but not as before. I need new cloth to wear since I gave the birth’. Then he replied, ‘from where I get you to be wear new cloth?’ I said, ‘I want a new dress since I gave birth. I care your children. I can't ask you to buy fabrics. If I don't care for them, I will take care of myself. You are the one who offered me to dress well.’ He slapped me from talking to him in this conversation*.(P-2)  *“…The other thing, I also wanted to be well dressed and clothed. Making wife well dressed and clothed looking the husband; in this case if I say to do so, this was disgusting for him. Our character didn't go together.”*(P-4)  *“…I suffered a lot of hungry. He did not give me anything and even, he gives me, he does it for sake of daughter. Based on this, when walk into the home, it move me around.”*(P-9)  *“…he did not fulfil household shortage; he did not ask what hardship was. I am suffering lonely. When he gets a salary; he spent it outside simply. This instigates us to be fight. He did not give any cents. He simply looks when I am suffering with children.”*(P-11)  *“…Not giving money properly for household necessities…transferring all property to other relatives and making her empty”* (HEW-1)  *“…Commonly mothers come here with complaints of household administrative problems”(HEW-3)* |
| Factors associated with Perinatal IPV | Excess alcohol consumptions | *“…Because of that, baby lost her breath for a long time. When he did this, he was not aware of it because he was drunk.”(P-1)*  *“...At times; I was powerless [at verge of pregnancy]. ‘Where are you going? I will be asked by neighbors,’ he said and he punched me because he was drunk.”(P-10)*  *“He beats me when he goes for drinking spree and come home drank. When drank, he insults in worthy and in vain. Drinking cannot be separated from his life."* (P-11)  *“…When he intoxicates in the spirit of drink, he insults me shamefully*.” (P-17)  *“…He drinks alcohol and fights with me”* (P-19) |
|  | Use of birth controls | *“…When I came from my family home I have brought the birth control pills, but he forbids me to use. For instance, one day he found the pills from where I put and secretly hid them.”* (P-1)  *“…He beats me… ‘Remove what you inserted [implanol] in your hand? You are living simply. You are not worthy without giving me more children,’ he said.”(P-2)*  *‘’…I didn’t get pregnant as I was on contraceptive use for two years. ’You stayed two years due to an injection,’ he said. Then he beat and broke my hand.”(P-5)*  *“…However, he insisted to stop using the injection [implanol] and I said no. We engaged into conflict and fought. Then, in front of people he gathered, I said that he was not good for me even the first Child. Due to this case, we quarreled in front of the gathered people” (P-2).*  “…*Once he had beaten me very dangerously due to it [birth control] and I was sick for four weeks”* (P-18) |
| Preference for a male child | *“…he came and saw a baby girl after two days. After he proved it was a baby girl, he made quarrel with me and grabbed the baby from my hand to throw in far distance. From his evil ideas, he threw baby.”*(P-1)  *“… He asked them [Health care providers] whether pregnancy was a boy or girl.”*(P-7)  *“…after getting antenatal checkup for the last pregnancy, he wanted to know the sex of the coming child.”* (P-7)  *Another participant said that,"… I had given birth of baby girls consecutively. In this case, we had been fighting each other before. With help of God, in this year, I delivered this baby boy. Now, he is good for me” (P-13)* |
| Partner suspicion of infidelity | *“…At that time I never know. He was intimate with another female. He had sex with her and came and insulted me. Always, he supported here ideas.”* (P-1)  *” He has spoiled the life many girls by renting a house. He brought some of them from rural area with lots of fantasy and committed adultery with them.” (*P-9)  *“…He had a close friendship with a neighboring woman. She is a good person. However; he made her his intimate friend.”* (P-8)  *“…we quarreled after I had heard he is in relationship other girl. Then, I went for my family, but he called me and said, ‘don’t come on my life, I continued my life. You can continue your own life.’ ”* (P-12)  *“…One day two women come here with small kids. One woman says I am his wife and another woman says again I am his wife.”(HEW-2)*  *“…Commonly what hear here men are not tolerant. They go for other girls” (HEW-3)* |
| Suspicion of newborn | *“…immediately after giving birth, I called and informed him that I gave birth. He said, ‘No! It is seven months, not nine months.”* (P-7)  *“…this lead to disagreements. To me it seems, he suspected the pregnancy was not his.”*(P-8)  *“…When we negotiate them here, some husbands say, ‘I don’t believe about last child. She had gone to their family in the last fight” (HEW-3)* |
| Partner jealousy | *“He did not let me go the market and did not allow me go out. I would not speak if one of my family members came to our house. We just could not speak… he was waiting.”* (P-5)  *“Simply, a sense of jealous was there when talking with neighbors and others. This grew to a disagreement.”* (P-8)  *“… he stays away from the house falsely and suddenly came home to see if I was home or not.”*(P-9) |
| Family and peer interventions | *“Once upon a time when I was four months pregnant, I was cleaning our home and a woman next to our door abused me. As soon as my husband arrived to the home he has slapped me by supporting her. After that, one ear stopped hearing."* (P-1)  *“He screamed at me. For that matter; the problem was raised by the family. We started fighting because of family issues.” (P-2)*  *“…It was because of family issues. I called him to his place when cows fed plant seeds.”*(P-6)  *“…while I was working there; they were written; they posted on my back what I did not do. Just I said; ‘God you see it.’ When I have been serving people with good morals; but they rumored me in bad. The whole his family rumored.”* (P-6)  *“Women from the neighborhood told him that I had visited women's affairs office…she told him that he should discipline me. After that, he constantly threatened me with a knife. He just became skeptical since he believes that I took someone else's advice.”* (P-9)  *“…He had chosen to be with his family to left me”* (P-22)  *“…There are many families, friends and neighbors that disturb marriage bases.” (HEW-2)* |
| Implications of Perinatal IPV | Miscarriages | *“Then after, I have used it for four months; I had made it to be removed. I didn’t want that much since I was so worried and saved from half dead. I was very scared. I am so afraid after experiencing miscarriage.”* (P-3)  *“…I consulted my mother about having an abortion. However, my mother rejected even in the first baby.”* (P-5)  *“…I suffered a lot due to miscarriages, unknowingly. It affected me a lot. I miscarried twice here. It damaged me severely since I had lost a lot of blood.” (P-6)*  *“…Two times I had experienced miscarriages”(P-14)*  *“…I have tried many ways to discontinue it [pregnancy] after I became pregnant. I have rescued at verge of death since I have tried many traditional drugs”*(P-15)  *“…After that injury[physical violence], she had given dead birth after surgery”(HEW-4)* |
| Unintended pregnancies | *“I had no plans. I was thinking to take good care of this baby and to live the normal life after giving birth.However, he insisted on stopping injection [implanol]. Then I said no to him. I got into a conflict and fought with him. Then in front of people he gathered, I said he was not good for me even in the first Child. In this case, we had fought together in front of them.”* (P-2)  *“…My family was saying me be strong. They were advising me and returning me. In the middle of something was happened: Pregnancy has occurred.”* (P-3)  *I forgot the day to take while using it. It won't give you time. If you stop suddenly, you will become pregnant. I was forgetting it once. For this reason; and she was remained*.”(P-4)  *“He was saying; ‘’ do not to take injection’’ when I wanted to take it. After that; in between conception was remained in my womb.”* (P-5)  *“I did not want to give birth. Just it was remained in womb unintentional; then I was prepared to continue instead of aborting it by thinking that I get pregnant from legal husband. In this case; he was born.”*(P-5)  *“…Even, I thought to abort at that time. When they refused to abort, I frequently have used traditional drugs to abort but unable to do that.”* (P-20) |
|  | *“…some come with sick babies, some come with reproductive infections”(HEW-1)* |
| Attempting to kill self and newborn | *“I thought many times about committing suicide. I attempted to kill my daughter many times.”*(P-7)  *“…I was so hurt inside and thought of killing the baby. I had no hope of delivering safely since we were always in serious conflict. I was really worried until she gave birth.”* (P-8)  *“…like a crazy person, I was crying in my house and trying to throw the baby into the pit.”*(P-9) |
| Increased blood pressure | *“…my blood pressure rose unknowingly as we engaged in conflict each other and shouted for this and that.”* (P-3) |
| Sleeping disturbances | *“Hmm… he was angry and looked weird… with red eyes. I was afraid of sleeping at night because I thought he could do something to me.”* (P-3)  *“When he returns to home, he just comes with squeezed face. Then after, nagging me throughout night. No peaceful sleep. Anyhow leave it.”(*P-8)  *“…at night time, I lost to sleep. I thought I would be killed at night.”* (P-9) |
| Perinatal mental Trauma | *“I didn't ask for everything in the house, and when I asked him, he was answering me to sit quietly to raise my children. I am mentally wounded. When he comes from outside; I am very worried. I'm paying more attention to what he has to say to me.”* (P-3)  *“In addition; I am mentally ill; for that reason my mom is not volunteer to go out. Since I am in so stressful condition; I am mentally very sick. Then; I went out ‘Gedam’[Traditional holy place to be healed].When my mom not allow me to go out; but my father pressures me to leave.”(P-5)*  *“It has been three weeks since I started again. At a time; I left this job before my mental was deceased”*(P-6)  *“I was abnormal at that time and then my neighbors took me to the place of "Tsebel" place [Traditional sacred water]. But I didn't recover. I've never been like this before. I was crazy and I was simply burning everything out. Even after that, her image was coming before me. She comes with a smoking face. If I understand the bad feelings right away, it will cause me to drop my child into the pit. There was nothing visible to me at the time, and it pushed me to throw this boy into the pit.However, my neighbor protected me so many times. This happens when I thought her.” (*P-9)  “So*, I felt loneness. Always I close the door and cries lonely!”* (P-20) |

**Supplementary file 3**

**Table 1: A summary of postpartum women’s lived experiences of perinatal intimate partner violence in Wolaita zone, Southern Ethiopia**

| Participants’ Code | Before pregnancy | During pregnancy | After pregnancy |
| --- | --- | --- | --- |
| P-1 | Psychological, Physical and Sexual violence ,Deprivations of basic needs | Psychological, Physical, Sexual, and Economic violence, controlling behaviors, Deprivations of basic needs | Psychological, Physical and Sexual violence ,Deprivations of basic needs |
| P-2 | Psychological, Physical, Sexual and Economic violence, Deprivations of basic needs | Psychological and Physical violence, Deprivations of basic needs | Psychological, Physical, Sexual and Economic violence Deprivations of basic needs |
| P-3 | Psychological and Physical Violence | Psychological and Physical violence | Psychological, Physical, Sexual and Economic violence, Controlling behaviors, Deprivations of basic needs |
| P-4 | Psychological, Physical , Sexual, Economic violence ,Deprivations of basic needs | Psychological, Physical, Sexual and Economic violence, Deprivations of basic needs | Psychological, Physical, Sexual and Economic violence, Deprivations of basic needs |
| P-5 | Psychological, Physical and Sexual violence | Psychological, Physical and Sexual violence, controlling behaviors | Psychological, Physical and Sexual violence, Controlling behaviors |
| P-6 | Psychological, Physical and Sexual violence | Psychological violence, Economic violence | Psychological violence. |
| P-7 | Psychological and Sexual violence | Psychological violence, Deprivations of basic needs | Psychological and Economic violence |
| P-8 | Psychological violence, Deprivations of basic needs | Psychological and Physical violence, Controlling behaviors | Psychological, Physical and Sexual violence, Controlling behaviors |
| P-9 | Psychological violence, Controlling behaviors | Psychological, Physical and Sexual violence | Psychological, Physical and Economic violence |
| P-10 | Psychological, Physical, Sexual and Economic violence, Controlling behaviors, deprivations of basic needs | Psychological, Physical, sexual and Economic violence, controlling behaviors, deprivations of basic needs | Economic violence, Deprivations of basic needs |
| P-11 | Psychological violence, Deprivations of basic needs | Psychological and Physical violence, Deprivations of basic needs | Psychological and Physical violence, Deprivations of basic needs |
| P-12 | Physical violence, Economic violence | Psychological, Physical violence and Economic violence deprivation of basic needs | Psychological, Physical violence and Economic controlling behaviors, deprivation of basic needs |
| P-13 |  |  | Psychological and physical violence, Deprivation of basic needs |
| P-14 | Psychological and physical violence, Deprivation of basic needs | Psychological, physical violence, Deprivation of basic needs | Psychological and physical violence, Deprivation of basic needs |
| P-15 | Psychological, physical and sexual violence, Deprivation of basic needs | Psychological, physical and sexual violence, Deprivation of basic needs | Psychological, physical and sexual violence, Deprivation of basic needs |
| P-16 |  |  | Deprivation of basic needs |
| P-17 | Psychological, controlling behaviors, Deprivation of basic needs | Psychological, Deprivation of basic needs | Psychological, physical and sexual violence, controlling behaviors, Deprivation of basic needs |
| P-18 | Sexual violence, Deprivation of basic needs | Sexual violence, Deprivation of basic needs | Psychological and physical violence, controlling behaviors, Deprivation of basic needs |
| P-19 | Physical violence | Psychological and sexual violence | Psychological, physical and sexual violence |
| P-20 | Physical violence |  | Psychological violence, Deprivation of basic needs |
| P-21 |  |  | Psychological violence, Deprivation of basic needs |
| P-22 |  |  | Psychological, physical and economic violence controlling behaviors |
